# Supplementary material for: CircCOL1A2 Sponges MiR-1286 to Promote Cell Invasion and Migration of Gastric Cancer by Elevating Expression of USP10 to Downregulate RFC2 Ubiquitination Level
Source: PubMed Central journal article supplement (PMC9628928; doi:10.4014/jmb.2112.12044), 2022-05-11
Supplement: jmb-32-7-938-supple.pdf [file jmb-32-7-938-supple.pdf]

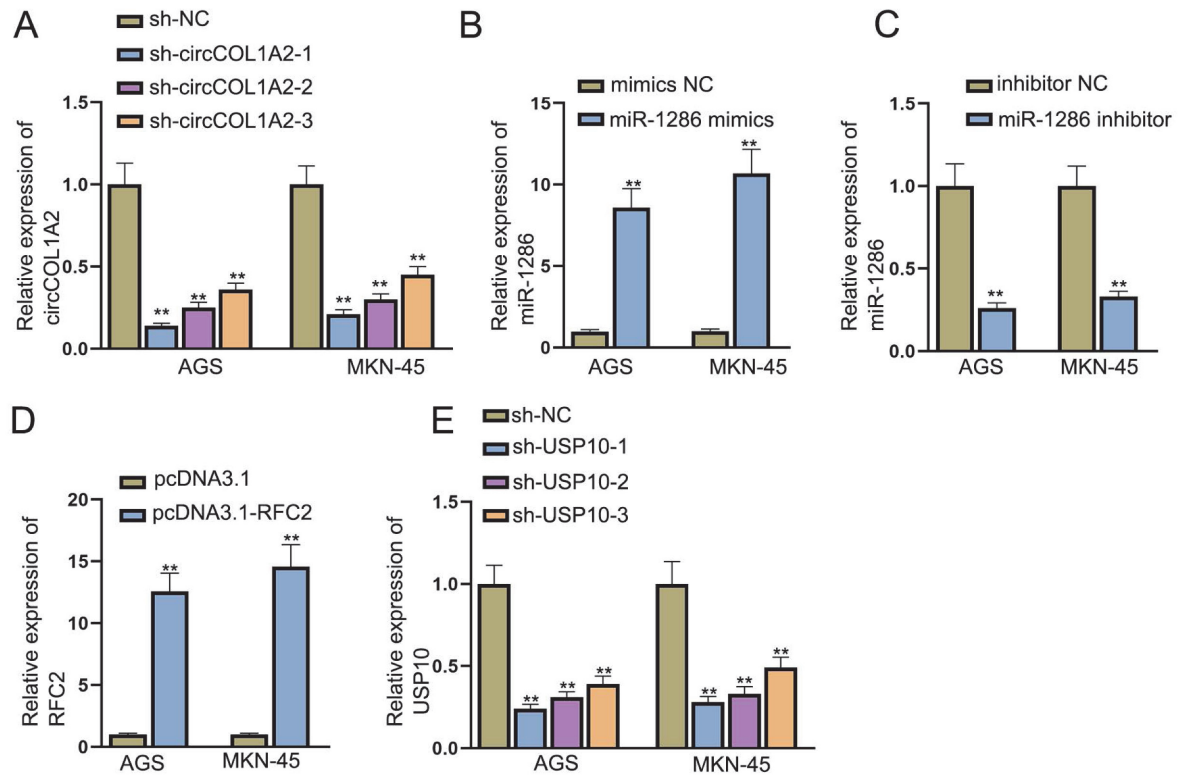

**Fig. S1.** The efficiencies of plasmids. (A-E) The efficiencies of sh-circCOL1A2-1/2/3, miR-1286 mimics, miR-1286 inhibitor, pcDNA3.1-RFC2 and sh-USP10-1/2/3 were assessed by qPCR. Student's *t*-test and one-way ANOVA were used for comparison detection. \*\*  $p < 0.01$ .
